# Supplementary material for: The role of 316 SS surface finishes in enhancing corrosion protection of conducting polyaniline coatings
Source: Royal Society of Chemistry journal article supplement (doi:10.1039/d6ra01684g), 2026-05-20
Supplement: d6ra01684g1.pdf [file d6ra01684g1.pdf]

## Supplementary Material

### **The role of 316 SS surface finishes in enhancing corrosion protection of conducting polyaniline coating**

Dat Minh Tran<sup>1,2</sup>, Anh Thi Nhat Cao<sup>3</sup>, Ngo Thanh Binh<sup>4</sup>, Nhung Thi Nguyen<sup>1,2</sup>, Casen Panaitescu<sup>5</sup>, Duong Ngo Kim Long<sup>1,2</sup>, Nhi Ngoc Nguyen<sup>1,2,\*</sup>, Nam Nguyen Dang<sup>1,2</sup>

<sup>1</sup>Future Materials & Devices Lab., Institute of Fundamental and Applied Sciences, Duy Tan University, Ho Chi Minh City 70000, Viet Nam

<sup>2</sup>The Faculty of Environmental and Chemical Engineering, Duy Tan University, Danang 55000, Viet Nam

<sup>3</sup>Ho Chi Minh City University of Technology and Education, Ho Chi Minh City 70000, Viet Nam

<sup>4</sup>Southern Branch of Joint Vietnam-Russia Tropical Science and Technology Research Center, 3, 3/2 Street, Vuon Lai Ward, Ho Chi Minh City, Viet Nam

<sup>5</sup>Department Petroleum Geology and Reservoir Engineering, Petroleum-Gas University of Ploiesti, Ploiesti, Romania

\*Email addresses: [nguyenngocnhi8@duytan.edu.vn](mailto:nguyenngocnhi8@duytan.edu.vn)

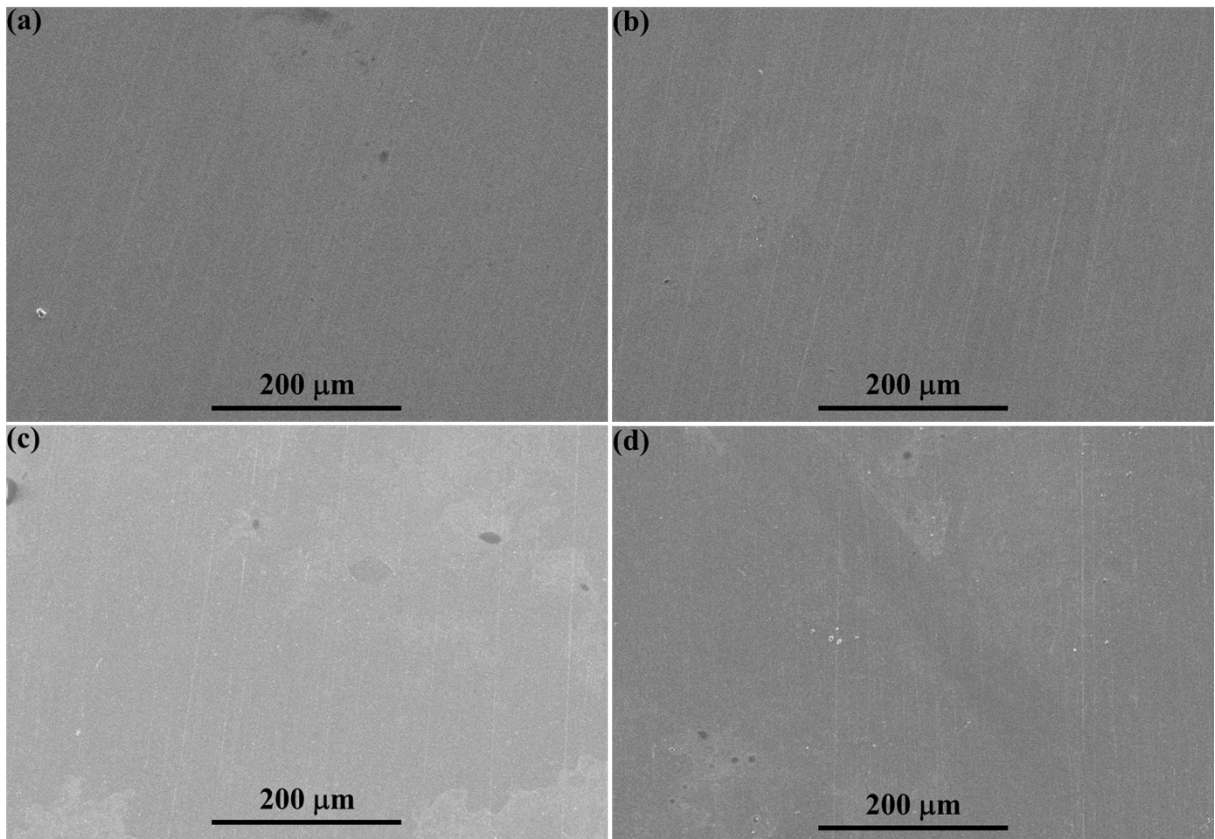

**Figure S1.** Low magnification images of surface morphology of (a) polishing 316 SS surface and (b) polishing and treating 316 SS surface, and PANi-coated (c) polishing 316 SS and (d) polishing and treating 316 SS.

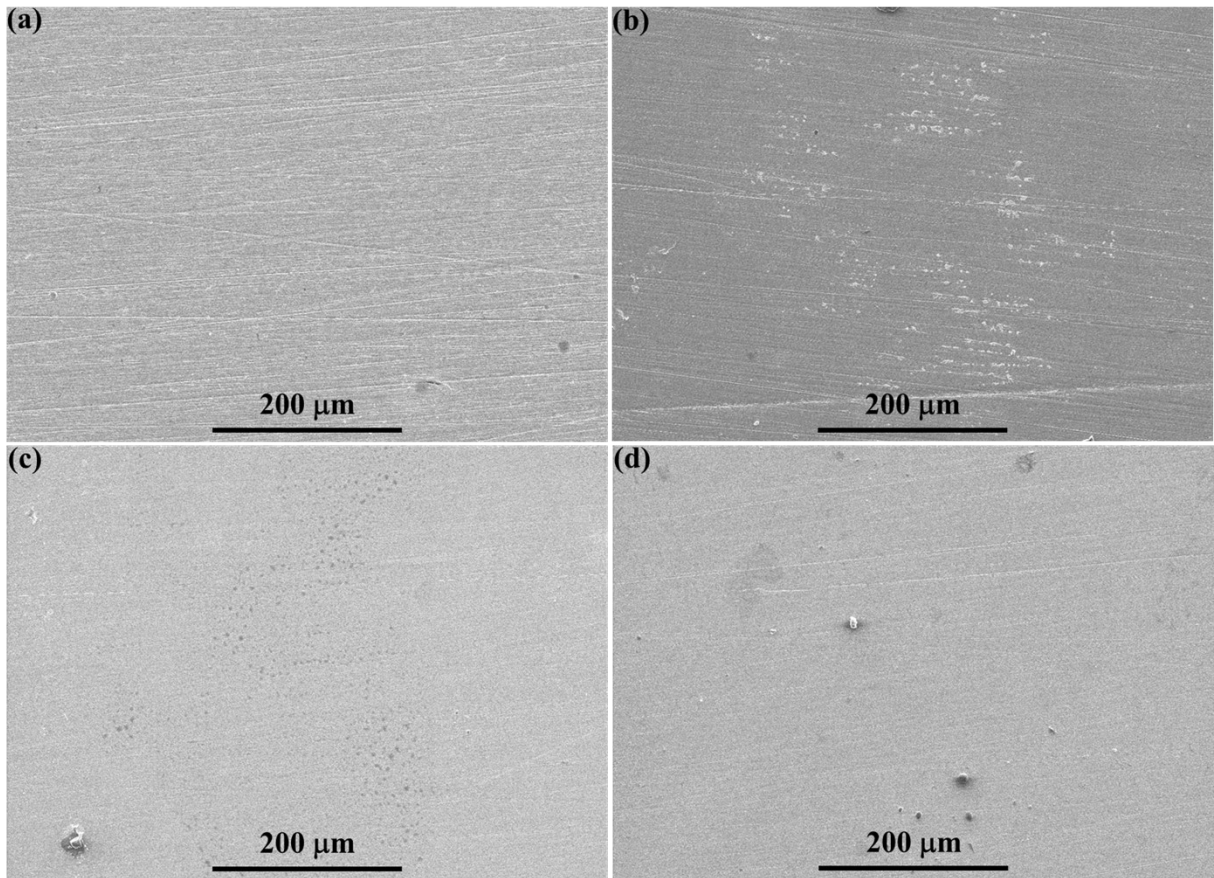

**Figure S2.** Low magnification images of surface morphology of (a) polishing 316 SS surface and (b) polishing and treating 316 SS surface, and PANi-coated (c) polishing 316 SS and (d) polishing and treating 316 SS after 168 h immersion in 3.5 wt.% NaCl solution.
